# Supplementary material
Source: HighWire-hosted journal article supplement (https://www.cmajopen.ca/highwire/filestream/87951/field_highwire_adjunct_files/3/2021-0046-4-at.pdf)
Supplement: 2021-0046-4-at.pdf [file 2021-0046-4-at.pdf]

#### Appendix 4 : Post-virtual meeting satisfaction survey results

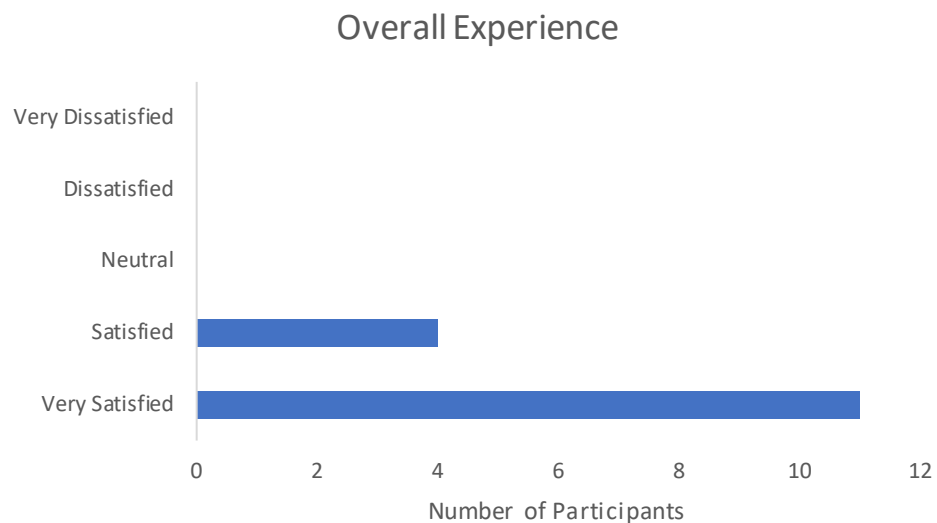

Figure 1: Overall experience with virtual meeting

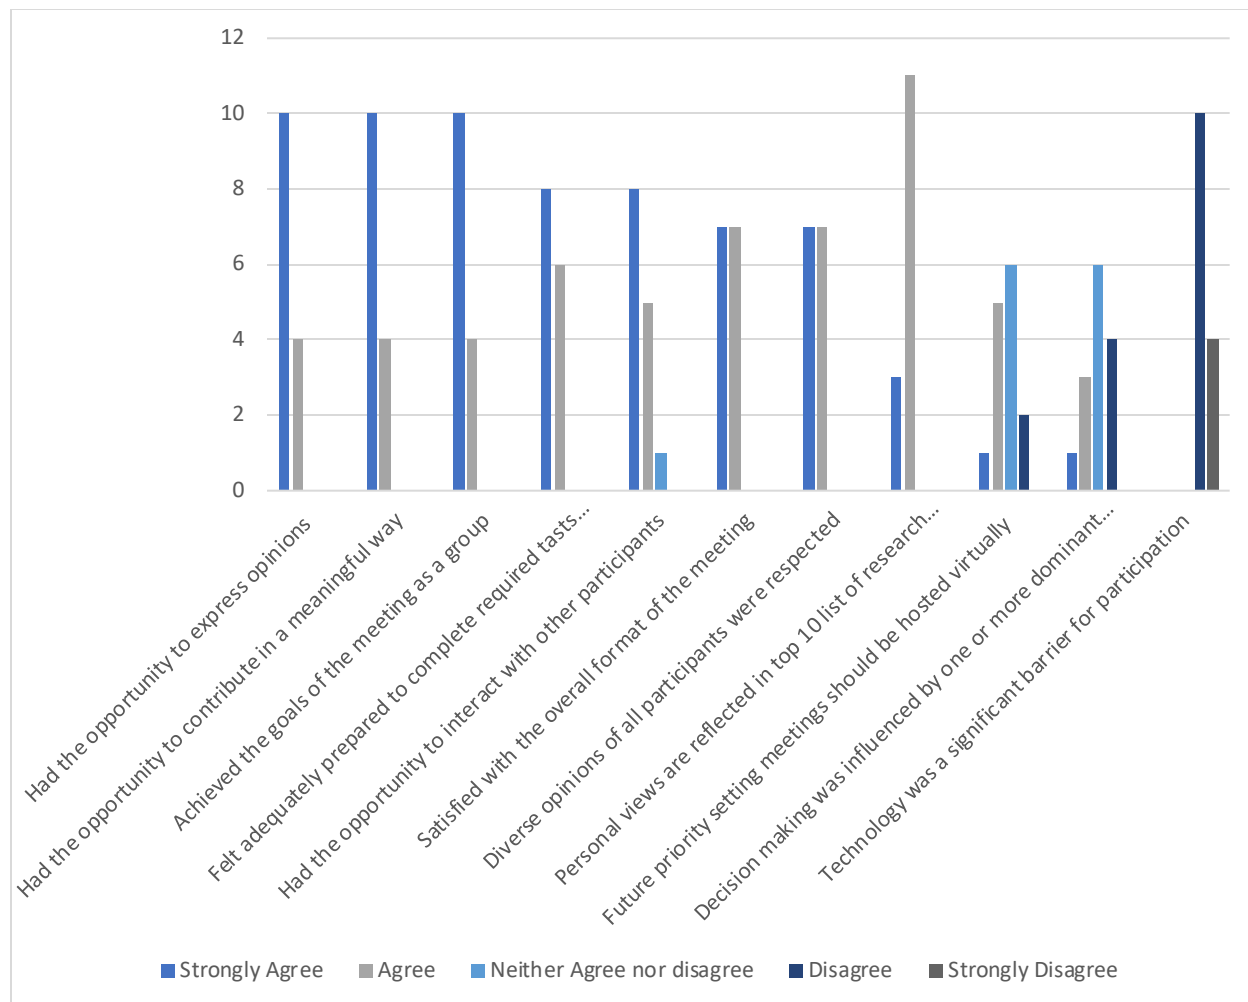

Figure 2: Participants views on engagement components of virtual meeting
